# Supplementary material for: Low-grade waste heat recovery for wastewater treatment using clathrate hydrate based technology
Source: Royal Society of Chemistry journal article supplement (doi:10.1039/d3se01440a), 2024-01-01
Supplement: d3se01440a1.pdf [file d3se01440a1.pdf]

## Supplementary information

### **Low-Grade Waste Heat Recovery for Wastewater Treatment Using Clathrate Hydrate Based Technology**

Lingjie Sun<sup>a,b</sup>, Aliakbar Hassanpouryouzband<sup>b,\*</sup>, Tian Wang<sup>a</sup>, Fan Wang<sup>a,c</sup>, Lunxiang Zhang<sup>a,\*</sup>,  
Chuanxiao Cheng<sup>d</sup>, Jiafei Zhao<sup>a</sup>, Yongchen Song<sup>a,\*</sup>

- a. Key Laboratory of Ocean Energy Utilization and Energy Conservation of Ministry of Education, School of Energy and Power Engineering, Dalian University of Technology, Dalian 116024, China.
- b. School of Geosciences, University of Edinburgh, Grant Institute, West Main Road, Edinburgh EH9 3FE, U.K.
- c. School of Mechanical and Aerospace Engineering, Nanyang Technological University, 50 Nanyang Avenue, 639798, Singapore.
- d. School of Energy and Power Engineering, Zhengzhou University of Light Industry, Zhengzhou, 450002, China

\* Corresponding author. Email address: A Hassanpouryouzband ([Hssnpr@ed.ac.uk](mailto:Hssnpr@ed.ac.uk)); LX Zhang ([lunxiangzhang@dlut.edu.cn](mailto:lunxiangzhang@dlut.edu.cn)); YC Song ([songyc@dlut.edu.cn](mailto:songyc@dlut.edu.cn)).

## Experimental Methods

### Materials and Apparatus

The detailed information about the chemicals used in the experiment is shown in Table 1.

Table 1. The detailed information about the chemicals used in the experiment

| Materials                        | Chemical formula                                 | Purity | Supplier                                                                     |
|----------------------------------|--------------------------------------------------|--------|------------------------------------------------------------------------------|
| Hexahydrate chromium trichloride | $\text{CrCl}_3 \cdot 6\text{H}_2\text{O}$        | 99.0%  | Xilong Chemical Industry Incorporated Co., Ltd., Guangdong Province, P.R.C.  |
| Nickel sulfate hexahydrate       | $\text{NiSO}_4 \cdot 6\text{H}_2\text{O}$        | 98.5%  | Damao Chemical reagent Factory, Tianjin City, P.R.C.                         |
| Zinc sulfate heptahydrate        | $\text{ZnSO}_4 \cdot 7\text{H}_2\text{O}$        | 99.5%  | Xilong Chemical Industry Incorporated, Co., Ltd., Guangdong Province, P.R.C. |
| Copper sulfate pentahydrate      | $\text{CuSO}_4 \cdot 5\text{H}_2\text{O}$        | 99.0%  | Bodi Chemical Industry Incorporated Co., Ltd., Tianjin City, P.R.C.          |
| Methylene blue                   | $\text{C}_{16}\text{H}_{18}\text{ClN}_3\text{S}$ | 99.95% | J & K Scientific, Beijing, P.R.C.                                            |
| 1,1,1,2-Tetrafluoroethane        | $\text{C}_2\text{H}_2\text{F}_4$                 | 99.99% | Shandong Dongyue Chemical Co., Ltd., P.R.C.                                  |

The stimulated wastewater was prepared by adding a certain amount of methylene blue, hexahydrate chromium trichloride ( $\text{CrCl}_3 \cdot 6\text{H}_2\text{O}$ , 99.0%), nickel sulfate hexahydrate ( $\text{NiSO}_4 \cdot 6\text{H}_2\text{O}$ , 98.5%), zinc sulfate heptahydrate ( $\text{ZnSO}_4 \cdot 7\text{H}_2\text{O}$ , 99.5%), copper sulfate pentahydrate ( $\text{CuSO}_4 \cdot 5\text{H}_2\text{O}$ , 99.0%) to deionized water. The high-pressure chamber made from stainless steel (maximum 20 MPa designed pressure) and was manufactured by Shandong Zhongshi Dashi Technology Co., Ltd. P.R.C. The temperature of the chamber was controlled using a water bath (XT5718RCE800L, Xutemp, Hangzhou, Co., Ltd.) with an accuracy of  $\pm 0.1$  K and a temperature varying from 258K to 323K. Three thermocouples (Yamari Industries, Japan) with precisions of

$\pm 0.1$  K, were inserted into the sides of the chamber to monitor the temperature trajectories. A pressure transducer (Nagano Co., Ltd., Japan) was connected to the top of the cell to measure pressures in the range of 0-2.5 MPa with a precision of  $\pm 0.01$  MPa. Two electric heater with 0-100 W were used to simulate the low grade waste heat. Two types of simulated wastewater were prepared: organic wastewater (100mg/L MB), organic- heavy metal wastewater (100mg/L MB, each heavy metal ion 100mg/L).

### **Method**

The 4000ml of simulated wastewater is added to the chamber. The temperature of the chamber was controlled by water bath at 275K. R134a gas was injected into chamber at 0.5 MPa when the temperature of chamber decreased to 275K. After that, the electric heaters were opened to heat the liquid R134a until the bottom temperature in liquid was near 281K. Then, the electric heaters were turned off. During heating process, massive hydrates formed.

Following the completion of the hydrate formation, solid-liquid separation was performed through vacuum filtration or centrifugation. The hydrate was then transferred to a decomposer, where decomposition into water and R134a occurred at 298K. Finally, treated water and R134a could be obtained.

### **Measurements and Analysis**

The concentration of MB was determined through wavelength scanning within the range of 530–720 nm using a UV/Vis/NIR spectrophotometer (Lambda750S, USA). Calibration was conducted to establish the correlation between the UV absorption intensity and the concentration of MB, depicted in Fig. S1. The primary absorption band ( $\lambda_{\text{max}}$ ) of MB resides at 664 nm. Absorption spectra were measured for aqueous solutions of MB at various concentrations (0-4.5 mg/L). The calibration curve ( $R^2=0.999$ ) illustrating the relationship between absorbance and concentration is presented in Fig. S1b. If the concentration exceeds the detection limit, the sample is initially diluted to an appropriate concentration range and then measured using the UV-Vis-NIR spectrophotometer. The calibration curve equation accurately calculates the concentration of MB in the sample. The concentration of metal ions was determined using an inductively coupled plasma spectrometer (ICP, AVIO 500, PerkinElmer,

USA). Each sample was subjected to 2-3 detections by the ICP. The average value and error bars were calculated and are depicted in Fig. 4. The error bars represent the standard deviation.

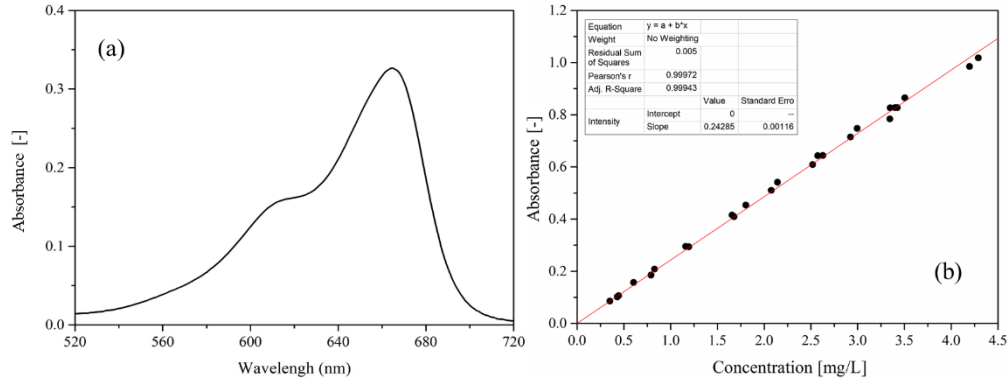

Fig. S1 (a) the absorption band of MB (b) The calibration curve of UV absorption spectra of aqueous solutions of MB at various concentrations.

## Calculation

### Removal efficiency for wastewater

Based on the concentrations of MB or heavy metal ions measured, the removal efficiency was calculated as follows<sup>1-3</sup>:

$$\text{Removal Efficiency} = \frac{C_i - C_d}{C_i} \times 100\% \quad (1)$$

where  $C_i$  and  $C_d$  are the concentrations of MB or heavy metal ions in the simulated wastewater and water from the decomposition. The  $C_d$  includes water obtained from decomposition through vacuum filtration or centrifugation.

### Energy utilization efficiency for low grade waste heat

The Figure S2 shows the schematic diagram of the bottom heater structure of the chamber. The angle is  $165^\circ$ . Thus, the theory energy utilization efficiency can reach 51.4%.

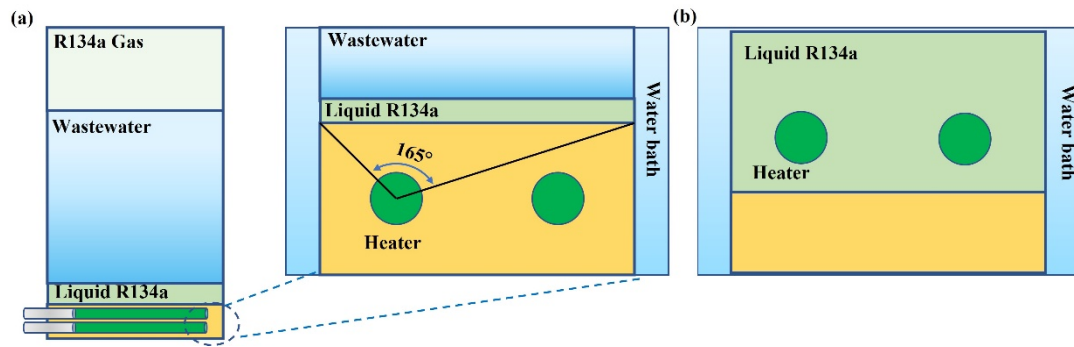

Figure S2 (a) schematic diagram of the bottom heater structure of the chamber. (b) The improved structure of heater in the future can enhance the energy utilization efficiency for low grade waste heat.

## References

- [1] Park, K. et al. A new apparatus for seawater desalination by gas hydrate process and removal characteristics of dissolved minerals ( $\text{Na}^+$ ,  $\text{Mg}^{2+}$ ,  $\text{Ca}^{2+}$ ,  $\text{K}^+$ ,  $\text{B}^{3+}$ ). *Desalination* 2011, 274, 91–96.
- [2] Dong, H.; Zhang, L.; Ling, Z.; Zhao, J.; Song, Y. The Controlling Factors and Ion Exclusion Mechanism of Hydrate-Based Pollutant Removal. *ACS Sustainable Chem. Eng.* 2019, 7, 8, 7932–7940.
- [3] Sun, L.; Dong, H.; Lu, Y.; Zhang, L.; Yang, L.; Zhao, J.; Song, Y. A hydrate-based zero liquid discharge method for high-concentration organic wastewater: resource recovery and water reclamation. *NPJ Clean Water.* 2023, 6, 49.
